# Supplementary material for: Possessing 21st-Century Skills and Building Sustainable Careers: Early-Career Social Sciences Graduates’ Perspectives
Source: MDPI journal article supplement (doi:10.3390/su16083409), 2024-04-18
Supplement: s1 [file s1]

## Supplementary File S1

**Table S1.** Measures and Related Items

| Original Item                                                                             | Final Item                                                                                       |
|-------------------------------------------------------------------------------------------|--------------------------------------------------------------------------------------------------|
| <b>Communication</b> (Communication Competency Scale [81])                                |                                                                                                  |
| 1. This person has a good command of the language.                                        | I have a good command of the language that I dominantly use in my work.                          |
| 2. This person typically gets right to the point.                                         | I typically get right to the point.                                                              |
| 3. This person can deal with others effectively.                                          | I can deal with others effectively.                                                              |
| 4. This person's writing is difficult to understand. (R)                                  | My writing is difficult to understand.                                                           |
| 5. This person expresses his or her ideas clearly.                                        | I express my ideas clearly.                                                                      |
| 6. This person is difficult to understand when he or she speaks. (R)                      | People find it difficult to understand what I am trying to say.                                  |
| 7. This person generally says the right thing at the right time.                          | I say the right thing at the right time.                                                         |
| 8. This person is a good listener.                                                        | I am a good listener.                                                                            |
| 9. This person is easy to talk to.                                                        | I am easy to talk to.                                                                            |
| 10. This person usually responds to messages (memos, phone calls, reports, etc.) quickly. | I respond to messages quickly (emails, memos, phone calls, reports, etc.).                       |
| 11. This person pays attention to what other people say to him or her                     | I pay attention to what other people say to me.                                                  |
| 12. This person is sensitive to others' needs of the moment.                              | I am sensitive to others' needs of the moment.                                                   |
| <b>Collaboration</b> (Self-Assessed Collaboration Skills Scale-SACS [82])                 |                                                                                                  |
| 1. I share information with others easily                                                 | I can share information with others easily.                                                      |
| 2. It is hard for me to share my ideas with others. (R)                                   | It is hard for me to share my ideas with others.                                                 |
| 3. I routinely listen to the opinions of my fellow team members.                          | I am good at listening to the opinions of my fellow colleagues.                                  |
| 4. I regularly acknowledge the efforts of my team members.                                | I find it easy to acknowledge the efforts of my colleagues.                                      |
| 5. I consistently support the efforts of others.                                          | I am good at supporting the efforts of others.                                                   |
| 6. I frequently seek feedback from my team members about the quality of my work.          | I am capable of asking for feedback from my colleagues about the quality of my work.             |
| 7. I routinely go out and get all the information I can from my teammates.                | I find it easy to go out and get all the information I can from my colleagues.                   |
| 8. I encourage other team members to get involved in the decisions that affect the team.  | I am good at encouraging other colleagues to get involved in the decisions that affect the team. |

|                                                                                                      |                                                                                                      |
|------------------------------------------------------------------------------------------------------|------------------------------------------------------------------------------------------------------|
| 9. I voice my ideas about how the team could work better together.                                   | I am capable of voicing my ideas about how the team could work better together.                      |
| 10. I consistently participate in team discussions with an open mind.                                | I am good at participating in team discussions with an open mind.                                    |
| 11. I seek out different views than my own during team discussions.                                  | I have the ability to seek out different views than my own during team discussions.                  |
| <b>Creativity<sup>a</sup></b> (Creative Potential Scale [83])                                        |                                                                                                      |
| 1. I feel that I am good at generating novel ideas.                                                  | I am good at generating novel ideas.                                                                 |
| 2. I have a knack the ability to further develop the ideas of others.                                | I have the ability to further develop the ideas of others.                                           |
| 3. I am good at finding creative ways to solve problems.                                             | I am good at finding creative ways to solve problems.                                                |
| 4. I feel comfortable to try out new ideas.                                                          | I am able to try out new ideas.                                                                      |
| <b>Critical Thinking<sup>b</sup></b> (Critical Thinking Toolkit-CriTT [85])                          |                                                                                                      |
| I can detect the use of inappropriate emotional language in scientific arguments.                    | I can detect the use of inappropriate emotional language in arguments.                               |
| I have a well-defined goal in mind when I am critical.                                               | I have a well-defined goal in mind when I am critical.                                               |
| I can identify the structure of arguments without being distracted by their content.                 | I can identify the structure of arguments without being distracted by their content.                 |
| I can express my critical thinking well in my written work.                                          | I can express my critical thinking well in my written work.                                          |
| I have a focused and systematic way of thinking.                                                     | I have a focused and systematic way of thinking.                                                     |
| Generally, I am a good critical thinker.                                                             | I am a good critical thinker.                                                                        |
| I do well in assessments that ask for critical evaluation.                                           | I do well in assessments that ask for critical evaluation.                                           |
| I think critically while working on my assignments.                                                  | I think critically while working.                                                                    |
| I know how to approach complex issues in a variety of ways.                                          | I know how to approach complex issues in a variety of ways.                                          |
| I have the ability to judge the value of new information or evidence presented to me.                | I have the ability to judge the value of new information or evidence presented to me.                |
| I can evaluate the arguments of others well.                                                         | I can evaluate the arguments of others well.                                                         |
| I am good at weighing up both sides of an argument.                                                  | I am good at weighing up both sides of an argument.                                                  |
| I think critically while reading.                                                                    | I think critically while reading.                                                                    |
| I can rephrase the arguments of others in my own words easily.                                       | I can rephrase the arguments of others in my own words easily.                                       |
| <b>Problem-Solving</b> (Problem-Solving Inventory [86])                                              |                                                                                                      |
| I am usually able to think up effective and creative alternatives to solve a problem.                | I am able to think up effective alternatives to solve a problem.                                     |
| I have the ability to solve most problems even though initially no solution is immediately apparent. | I have the ability to solve most problems even though initially no solution is immediately apparent. |

|                                                                                                                                                                                                                                                                                                                                                                                                                                                                                                                                                                                                                                                                                                                                                                                                       |                                                                                                                                                                                                                                                                                                                                                                                                                                                                                                                                                                                                                                                                                                  |
|-------------------------------------------------------------------------------------------------------------------------------------------------------------------------------------------------------------------------------------------------------------------------------------------------------------------------------------------------------------------------------------------------------------------------------------------------------------------------------------------------------------------------------------------------------------------------------------------------------------------------------------------------------------------------------------------------------------------------------------------------------------------------------------------------------|--------------------------------------------------------------------------------------------------------------------------------------------------------------------------------------------------------------------------------------------------------------------------------------------------------------------------------------------------------------------------------------------------------------------------------------------------------------------------------------------------------------------------------------------------------------------------------------------------------------------------------------------------------------------------------------------------|
| <p>Many problems I face are too complex for me to solve. (R)</p> <p>I make decisions and am happy with them later</p> <p>When I make plans to solve a problem, I am almost certain that I can make them work.</p> <p>Given enough time and effort, I believe I can solve most problems that I confront me.</p> <p>When faced with a novel situation, I have confidence that I can handle problems that may arise.</p> <p>I trust my ability to solve new and difficult problems.</p> <p>After making a decision, the outcome I expected usually matches the actual outcome.</p> <p>When confronted with a problem, I am unsure of whether I can handle the situation. (R)</p> <p>When I become aware of a problem, one of the first things I do is to try to find out exactly what the problem is</p> | <p>Many problems I face are too complex for me to solve.</p> <p>I am happy with the outcomes of the decisions I made.</p> <p>When I make plans to solve a problem, I can make them work.</p> <p>Given enough time and effort, I can solve most problems that I face.</p> <p>When faced with a novel situation, I can handle problems that may arise.</p> <p>I am able to solve new and difficult problems.</p> <p>After making a decision, the outcome I expected matches the actual outcome.</p> <p>When confronted with a problem, I cannot handle the situation.</p> <p>When I become aware of a problem, one of the first things I do is to try to find out exactly what the problem is.</p> |
| <p><b>Career Satisfaction</b> (Career Satisfaction Scale [89])</p> <p>I am satisfied with the success I have achieved in my career.</p> <p>I am satisfied with the progress I have made toward meeting my overall career goals.</p> <p>I am satisfied with the progress I have made toward meeting my goals for income.</p> <p>I am satisfied with the progress I have made toward meeting my goals for advancement.</p> <p>I am satisfied with the progress I have made toward meeting my goals for the development of new skills.</p>                                                                                                                                                                                                                                                               | <p>I am satisfied with the success I have achieved in my career.</p> <p>I am satisfied with the progress I have made toward meeting my overall career goals.</p> <p>I am satisfied with the progress I have made toward meeting my goals for income.</p> <p>I am satisfied with the progress I have made toward meeting my goals for advancement.</p> <p>I am satisfied with the progress I have made toward meeting my goals for the development of new skills.</p>                                                                                                                                                                                                                             |
| <p><b>Work Engagement</b> (Ultra-Short Work Engagement Scale [91])</p> <p>At my work, I feel bursting with energy.</p> <p>I am enthusiastic about my job.</p> <p>I am absorbed in my work.</p>                                                                                                                                                                                                                                                                                                                                                                                                                                                                                                                                                                                                        | <p>At my work, I feel bursting with energy.</p> <p>I am enthusiastic about my job.</p> <p>I am absorbed in my work.</p>                                                                                                                                                                                                                                                                                                                                                                                                                                                                                                                                                                          |
| <p><b>Burnout</b> (Burnout Assessment Tool-BAT [94])</p> <p>At work, I feel mentally exhausted.</p> <p>After a day at work, I find it hard to recover my energy.</p> <p>At work, I feel physically exhausted.</p> <p>I feel a strong aversion towards my job.</p> <p>I'm cynical about what my work means to others.</p>                                                                                                                                                                                                                                                                                                                                                                                                                                                                              | <p>At work, I feel mentally exhausted.</p> <p>After a day at work, I find it hard to recover my energy.</p> <p>At work, I feel physically exhausted.</p> <p>I feel a strong aversion towards my job.</p> <p>I'm cynical about what my work means to others.</p>                                                                                                                                                                                                                                                                                                                                                                                                                                  |

|                                                                                                                                                                                                                                                                                                                                                                                                                                                                           |                                                                                                                                                                                                                                                                                                                                                                                                                                                          |
|---------------------------------------------------------------------------------------------------------------------------------------------------------------------------------------------------------------------------------------------------------------------------------------------------------------------------------------------------------------------------------------------------------------------------------------------------------------------------|----------------------------------------------------------------------------------------------------------------------------------------------------------------------------------------------------------------------------------------------------------------------------------------------------------------------------------------------------------------------------------------------------------------------------------------------------------|
| <p>At work, I have trouble staying focused.</p> <p>I struggle to find any enthusiasm for my work.</p> <p>When I'm working, I have trouble concentrating.</p> <p>I make mistakes in my work because I have my mind on other things.</p> <p>Most of the time when I'm at work, I don't feel that I have much to worry about.</p> <p>I do not recognize myself in the way I react emotionally at work.</p> <p>At work, I may overreact unintentionally.</p>                  | <p>At work, I have trouble staying focused.</p> <p>I struggle to find any enthusiasm for my work.</p> <p>When I'm working, I have trouble concentrating.</p> <p>I make mistakes in my work because I have my mind on other things.</p> <p>Most of the time when I'm at work, I don't feel that I have much to worry about.</p> <p>I do not recognize myself in the way I react emotionally at work.</p> <p>At work, I may overreact unintentionally.</p> |
| <p><b>Work-related Stress</b> (Work Stress Scale [92])</p> <p>A lot of time, my job makes me very frustrated or angry.</p> <p>I am usually calm and at ease when I'm working. (R)</p> <p>I am usually under a lot of pressure when I am at work.</p> <p>Most of the time when I'm at work, I don't feel that I have much to worry about. (R)</p> <p>When I am at work, I often feel tense or uptight.</p> <p>There are a lot of aspects of my job that make me upset.</p> | <p>A lot of time, my job makes me very frustrated or angry.</p> <p>I am usually calm and at ease when I'm working.</p> <p>I am usually under a lot of pressure when I am at work.</p> <p>Most of the time when I'm at work, I don't feel that I have much to worry about.</p> <p>When I am at work, I often feel tense or uptight.</p> <p>There are a lot of aspects of my job that make me upset.</p>                                                   |
| <p><b>Task Performance</b> [95]</p> <p>achieves the objectives of the job.</p> <p>meets criteria for performance.</p> <p>fulfills all the requirements of the job.</p>                                                                                                                                                                                                                                                                                                    | <p>I achieve the objectives of the job.</p> <p>I meet the criteria for performance.</p> <p>I fulfill all the requirements of the job.</p>                                                                                                                                                                                                                                                                                                                |
| <p><b>Contextual Performance</b> [95]</p> <p>helps other employees with their work when they have been absent.</p> <p>helps others when their workload increases (assists others until they get over the hurdles).</p> <p>volunteers to do things not formally required by the job.</p>                                                                                                                                                                                   | <p>I help colleagues with their work, for example when they have been absent or new to the organization.</p> <p>I help colleagues when their workload increases (I assist colleagues until they get over the hurdles).</p> <p>I am willing to volunteer to do things that are not so much part of my job but are in the best interest of my organization as a whole.</p>                                                                                 |
| <p><b>Innovative Output</b><sup>c</sup> (Innovative Output Scale [37])</p> <p>make suggestions to improve current products or services.</p> <p>Produce ideas to improve work practices.</p> <p>actively contribute to the development of new products or services.</p>                                                                                                                                                                                                    | <p>I make suggestions to improve current products or services.</p> <p>I produce ideas to improve work practices.</p> <p>I actively contribute to the development of new products or services.</p>                                                                                                                                                                                                                                                        |

|                                    |                                                                                |
|------------------------------------|--------------------------------------------------------------------------------|
| acquire new groups of customers.   | I acquire new groups of customers. / I reach to new target groups of citizens. |
| optimize the organization of work. | I optimize the organization of work.                                           |

Note. “(R)” denotes reverse scoring. The blue color indicates the changes made to the original items.

<sup>a</sup> Creativity scale originally included six items, but we removed two items namely “*I have the talent and skills to do my work well*” and “*I have confidence in my ability to solve problems creatively*”. The former was excluded as it was a very general statement and also omitted in a prior study due to low factor loading [84]. The latter was excluded because of its similarity with problem-solving items.

<sup>b</sup> Critical thinking scale originally included seventeen items, but we removed three items namely “*I can identify analogies between theories*”, “*When designing experiments, I can readily eliminate extraneous variables*”, and “*I think critically in lectures*” as these items were found to be more relevant to students rather than the intended target group (i.e., early-career social sciences graduates).

<sup>c</sup> Innovative output scale originally had six items, but we excluded the item “*I acquire new knowledge in my job*”. The rationale was that since our target group is in the early stages of their careers and new to their organizations, they would need to acquire a substantial amount of new knowledge in their work.

## Supplementary File S2. Additional Exploratory Regression Analyses

**Table S2.** Coefficients of the Regression Models without Problem-Solving.

| Model No | Dependent Variable  | Step                              | Independent Variables | <i>B</i> | <i>SE B</i> | $\beta$ | <i>t</i> | <i>p</i> |
|----------|---------------------|-----------------------------------|-----------------------|----------|-------------|---------|----------|----------|
| 1        | Burnout             | Step 1                            | Constant              | 2.70     | .33         |         | 8.11     | <.001    |
|          |                     |                                   | Age                   | -.02     | .01         | -.18    | -2.03    | .045     |
|          |                     |                                   | Sector                | 1.44     | .37         | .35     | 3.90     | <.001    |
|          |                     | $R^2 = .16$ ( $p < .001$ )        |                       |          |             |         |          |          |
|          |                     | Step 2                            | Constant              | 2.29     | .52         |         | 4.37     | <.001    |
|          |                     |                                   | Age                   | -.03     | .01         | -.20    | -2.14    | .035     |
|          |                     |                                   | Sector                | 1.43     | .37         | .35     | 3.87     | <.001    |
|          |                     |                                   | Creativity            | .12      | .11         | .09     | 1.02     | .311     |
|          |                     | $\Delta R^2 = .01$ ( $p = .311$ ) |                       |          |             |         |          |          |
|          |                     |                                   |                       |          |             |         |          |          |
| 2        | Work-related Stress | Step 1                            | Constant              | 2.42     | .07         |         | 32.67    | <.001    |
|          |                     |                                   | Sector                | 1.08     | .44         | .24     | 2.46     | .016     |
|          |                     | $R^2 = .06$ ( $p = .016$ )        |                       |          |             |         |          |          |
|          |                     | Step 2                            | Constant              | 1.94     | .53         |         | 3.66     | <.001    |
|          |                     |                                   | Sector                | 1.07     | .44         | .23     | 2.43     | .017     |
|          |                     |                                   | Creativity            | .12      | .13         | .09     | .92      | .360     |
|          |                     | $\Delta R^2 = .01$ ( $p = .360$ ) |                       |          |             |         |          |          |
|          |                     |                                   |                       |          |             |         |          |          |

**Table S3.** Coefficients of the Regression Models with Problem-Solving.

| Model No | Dependent Variable | Step   | Independent Variables | <i>B</i> | <i>SE B</i> | $\beta$ | <i>t</i> | <i>p</i> |
|----------|--------------------|--------|-----------------------|----------|-------------|---------|----------|----------|
| 1        | Burnout            | Step 1 | Constant              | 2.70     | .33         |         | 8.11     | <.001    |
|          |                    |        | Age                   | -.02     | .01         | -.18    | -2.03    | .045     |
|          |                    |        | Sector                | 1.44     | .37         | .35     | 3.90     | <.001    |

| Model No | Dependent Variable  | Step                              | Independent Variables | B    | SE B | $\beta$ | t     | p     |
|----------|---------------------|-----------------------------------|-----------------------|------|------|---------|-------|-------|
| 2        | Work-related Stress | $R^2 = .16$ ( $p < .001$ )        |                       |      |      |         |       |       |
|          |                     | Step 2                            | Constant              | 4.42 | .61  |         | 7.19  | <.001 |
|          |                     |                                   | Age                   | -.03 | .01  | -.22    | -2.68 | .009  |
|          |                     |                                   | Sector                | 1.44 | .33  | .35     | 4.39  | <.001 |
|          |                     |                                   | Problem-Solving       | -.90 | .17  | -.52    | -5.30 | <.001 |
|          |                     |                                   | Creativity            | .49  | .12  | .40     | 3.98  | <.001 |
|          |                     | $\Delta R^2 = .19$ ( $p < .001$ ) |                       |      |      |         |       |       |
|          |                     | Step 1                            | Constant              | 2.42 | .07  |         | 32.67 | <.001 |
|          |                     |                                   | Sector                | 1.08 | .44  | .24     | 2.46  | .016  |
|          |                     | $R^2 = .06$ ( $p = .016$ )        |                       |      |      |         |       |       |
|          |                     | Step 2                            | Constant              | 4.11 | .68  |         | 6.06  | <.001 |
|          |                     |                                   | Sector                | 1.08 | .40  | .24     | 2.69  | .008  |
|          |                     |                                   | Problem-Solving       | -.95 | .21  | -.49    | -4.58 | <.001 |
|          |                     |                                   | Creativity            | .52  | .15  | .37     | 3.45  | <.001 |
|          |                     | $\Delta R^2 = .17$ ( $p < .001$ ) |                       |      |      |         |       |       |

### Supplementary File S3

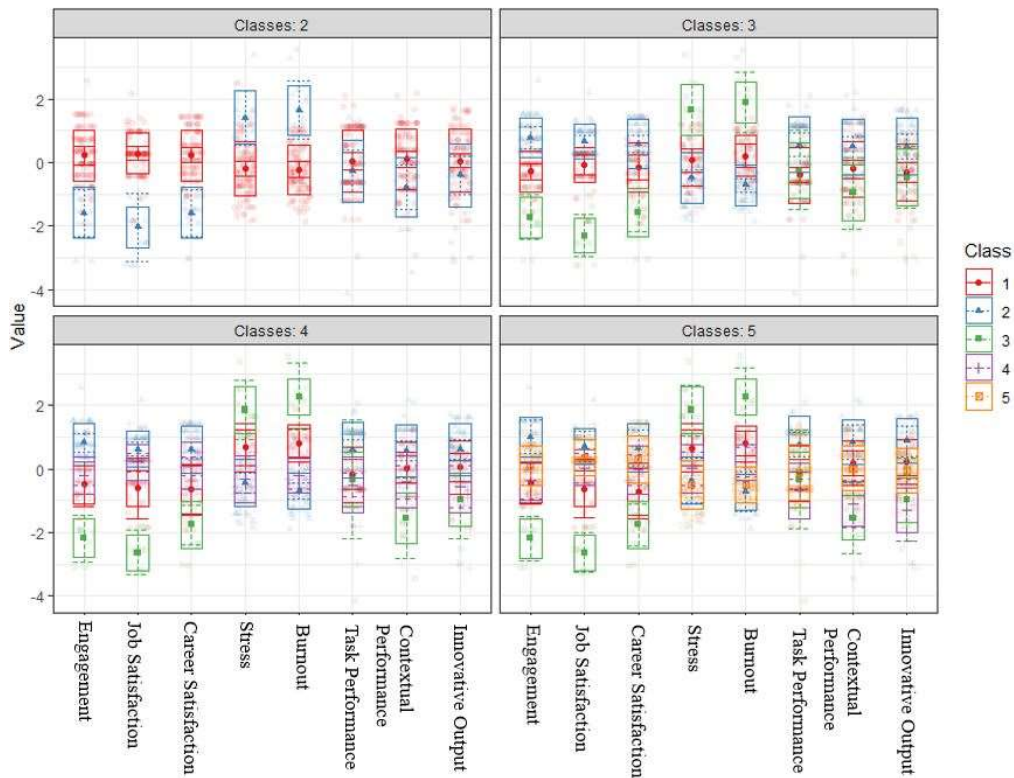

Figure S1. Indicator Patterns in Two, Three, Four and Five-Profile Models.
