# Supplementary material for: Possessing 21st-Century Skills and Building Sustainable Careers: Early-Career Social Sciences Graduates’ Perspectives
Source: MDPI journal article supplement (doi:10.3390/su16083409), 2024-04-18
Supplement: s1 [file s1]

Archive with 1 entries (1 files):
- sustainability-2936710-supplementary.pdf
